# Supplementary material
Source: Springer Nature journal article supplement (https://www.springermedizin.de/resource/supplementary/12955_2011_936_MOESM1_ESM.pdf/9558842)

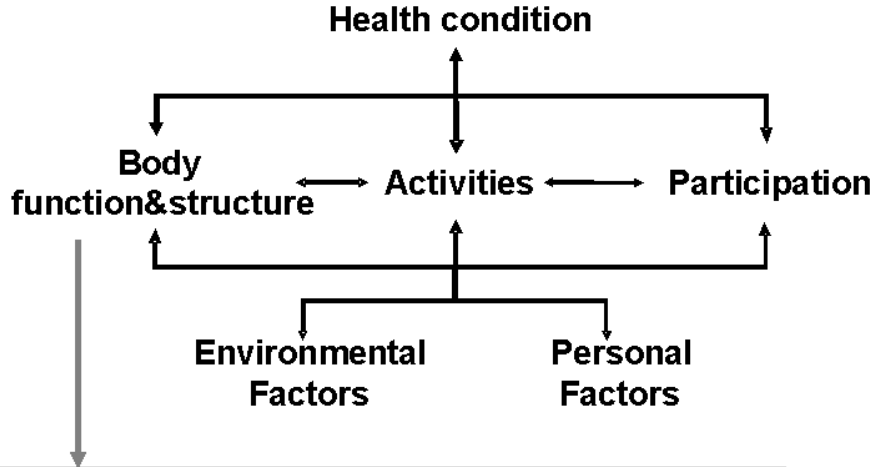

Supplement: MOESM1 [file 9558842]
